# Supplementary material for: An optimized methodology for whole genome sequencing of RNA respiratory viruses from nasopharyngeal aspirates
Source: PLoS One. 2018 Jun 25;13(6):e0199714. doi: 10.1371/journal.pone.0199714 (PMC6016902; doi:10.1371/journal.pone.0199714)
Supplement: S1 Table — (XLSX) [file pone.0199714.s002.xlsx]

## Sheet: Supplementary Table 
Supplementary Table. Minimum (Min), maximum (Max) and average (Avg) depth of coverage with and without duplicated reads per gene per sample. All samples were sequenced with the methodology selected as the optimal (C methodology).
Gene	HRSV/B/004						HRSV/B/006						HRSV/A/007						HRSV/B/008						HRSV/A/009						HRSV/A/010						HRSV/B/011
	With duplicated reads			Without duplicated reads			With duplicated reads			Without duplicated reads			With duplicated reads			Without duplicated reads			With duplicated reads			Without duplicated reads			With duplicated reads			Without duplicated reads			With duplicated reads			Without duplicated reads			With duplicated reads			Without duplicated reads
	Min	Max	Avg	Min	Max	Avg	Min	Max	Avg	Min	Max	Avg	Min	Max	Avg	Min	Max	Avg	Min	Max	Avg	Min	Max	Avg	Min	Max	Avg	Min	Max	Avg	Min	Max	Avg	Min	Max	Avg	Min	Max	Avg	Min	Max	Avg
NS1	106	376	234	45	118	89	36	780	443	21	124	90	3	28	18	3	24	15	2	32	22	2	24	17	38	118	87	21	60	46	223	1259	894	57	157	122	15	179	119	11	68	53
NS2	334	1323	944	91	165	144	257	2525	1085	91	172	140	12	246	160	10	91	64	1	118	56	1	59	32	742	14081	9909	89	212	190	585	2068	1266	108	185	150	343	8625	4694	95	221	174
N	330	1707	952	92	168	134	44	6724	1424	31	194	115	37	1918	622	26	145	89	0	118	29	0	55	18	25	5046	1188	16	175	82	212	2057	776	75	164	118	72	6456	1321	39	199	118
P	160	919	402	67	159	105	417	6449	1917	98	198	144	349	1138	648	77	141	110	7	178	59	7	74	33	442	2918	1866	99	176	151	210	6027	1524	76	207	132	203	5044	2853	82	193	162
M	504	2259	1267	122	190	160	142	4906	2338	69	193	158	84	303	182	43	89	70	20	220	129	19	80	57	474	2140	1018	99	152	126	241	2294	1360	89	184	148	737	1912	1252	127	168	149
SH	204	643	408	89	130	109	811	3823	2212	126	176	151	153	363	262	66	97	82	29	107	67	20	49	36	894	1608	1333	130	161	143	1586	4824	3065	144	183	166	1496	2912	2185	158	189	171
G	410	44720	15856	96	234	190	1167	242923	64584	139	239	204	489	8027	2556	97	205	157	27	5719	1385	21	192	117	2612	142350	42412	154	237	209	178	14918	2533	69	210	138	2447	56416	16161	136	239	202
F	52	2842	450	38	182	87	24	9039	1549	22	198	114	9	433	53	8	99	30	1	283	43	1	96	21	17	1414	154	12	147	54	218	4209	1047	73	184	124	15	1460	361	14	159	81
M2	11	229	105	11	101	56	1	478	150	1	103	52	8	1317	540	5	152	85	0	24	8	0	18	7	35	4952	1846	24	203	124	137	783	491	72	145	112	6	5090	1978	4	206	118
L	10	778	172	8	144	59	3	1240	229	3	160	64	0	650	52	0	109	22	0	128	17	0	72	13	0	2646	219	0	156	46	141	3166	767	61	186	115	2	1830	224	2	150	52
